# Supplementary material for: Synaptotagmin 7 is targeted to the axonal plasma membrane through γ-secretase processing to promote synaptic vesicle docking in mouse hippocampal neurons
Source: eLife journal article supplement (doi:10.7554/elife.67261), 2021-09-20

Figure 4 - Figure Supplement 2a

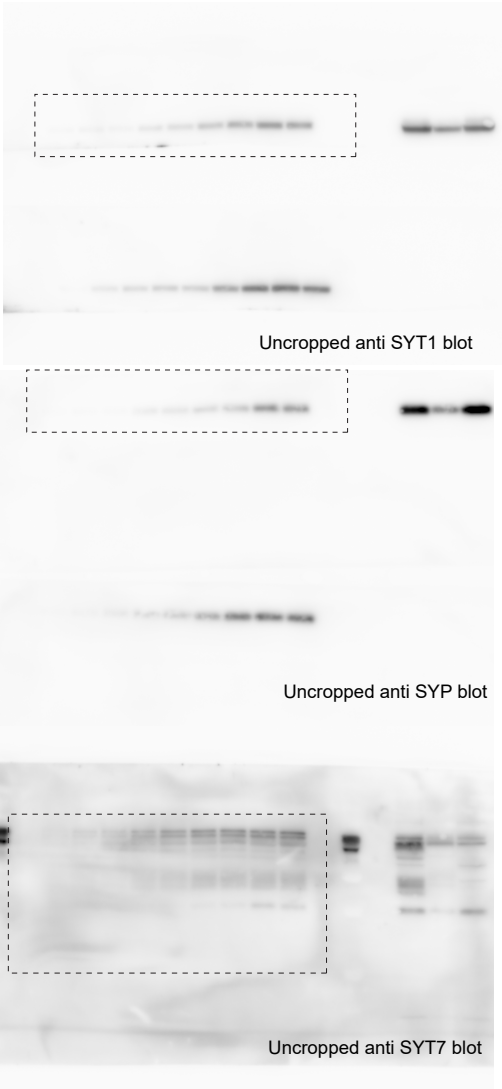

Figure 4 - Figure Supplement 3a

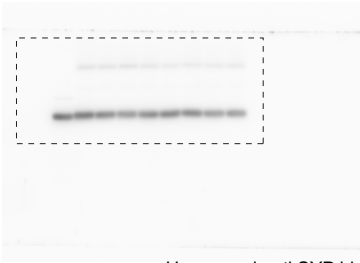

Figure 5a

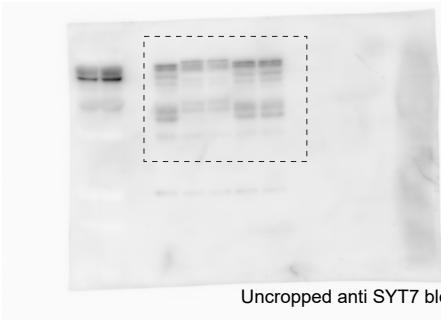

Figure 5b

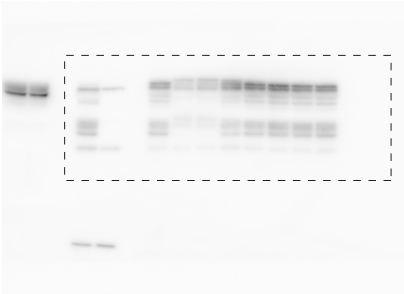

Figure 5 - figure supplement 1a

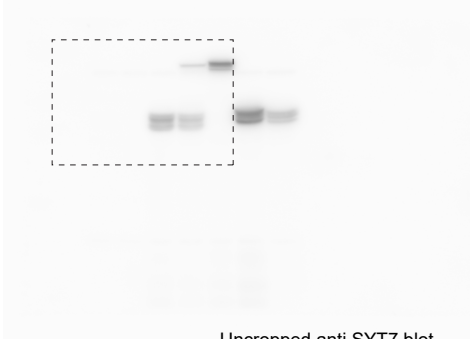

Figure 5 - figure supplement 1b

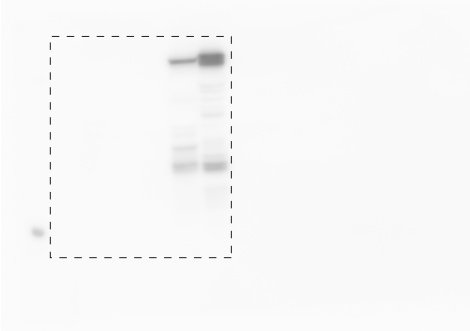

Figure 5 - figure supplement 1c-d

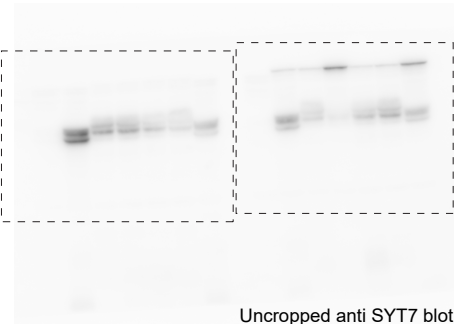

Figure 6e

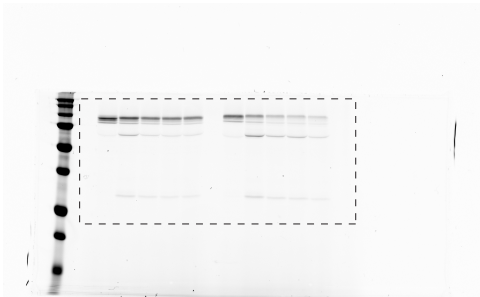

Figure 6 - figure supplement 1d-e

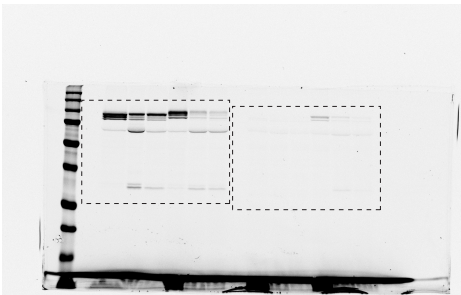

Figure 7 - figure supplement 1g

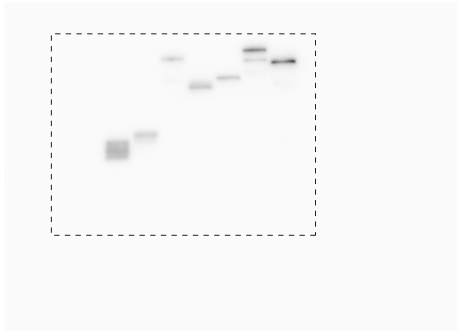

Supplement: data1 [file uncropped blots and gels with labels - 04-02-2021-RA-eLife-67261.pdf › Source data files/uncropped blots and gels with labels - 04-02-2021-RA-eLife-67261.pdf]
